# Supplementary material for: Nanoporosity of an organo-clay shown by hyperpolarized xenon and 2D NMR spectroscopy
Source: Royal Society of Chemistry journal article supplement (doi:10.1039/b602040b), 2006-01-01
Supplement: b602040b.pdf [file b602040b.pdf]

## Supplementary Information

# 5 Nanoporosity of an Organo-clay Shown by Hyperpolarized Xenon and 2D NMR Spectroscopy

Piero Sozzani,\* S. Bracco, A. Comotti, M. Mauri, R. Simonutti and P. Valsesia  
University of Milano Bicocca – Department of Materials Science, Via R. Cozzi 53, Milano.

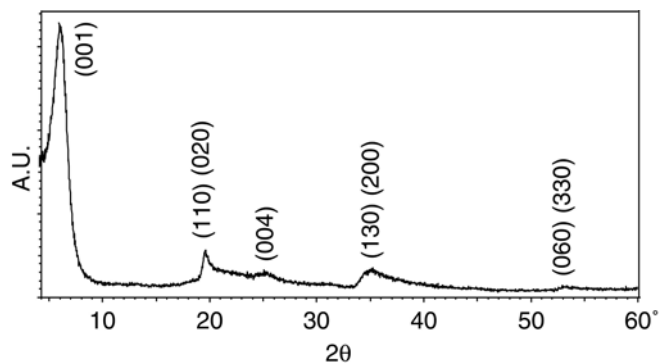

10 **Figure S1.** Powder X-ray diffraction of TEA-Hectorite. The profile was recorded by applying a 0.02° step and an acquisition time of 4s on a Bruker Advance D8 instrument.

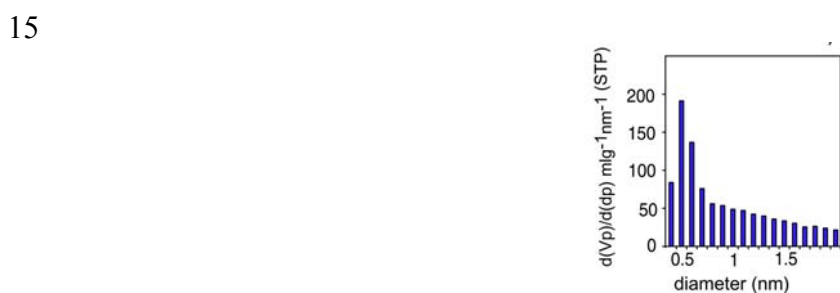

15 **Figure S2.** Pore distribution as obtained by Hovarth-Kavazoe method and based on nitrogen adsorption isotherm at 77K.
